# Supplementary material for: Nutritional Composition of Gluten-Free Labelled Foods in the Slovenian Food Supply
Source: PubMed Central journal article supplement (PMC7664664; doi:10.3390/ijerph17218239), 2020-11-07
Supplement: ijerph-17-08239-s001.pdf [file ijerph-17-08239-s001.pdf]

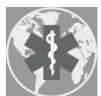

## Supplementary material

**Table S1.** Gluten-free labelling and results of nutrient profiling using NPSC per category (GF – gluten-free).

|                                   | All products (N) | GF (N) | GF (%) | »Healthier« (N) | »Less healthy« (N) |
|-----------------------------------|------------------|--------|--------|-----------------|--------------------|
| <b>Beverages</b>                  | 922              | 10     | 1      | 10              |                    |
| <b>Coffee and tea</b>             | 156              | 1      | 1      | 1               |                    |
| Coffee mixes                      | 90               |        |        |                 |                    |
| Instant coffee                    | 10               |        |        |                 |                    |
| Tea                               | 56               | 1      | 2      | 1               |                    |
| <b>Cordials</b>                   | 74               |        |        |                 |                    |
| Cordials                          | 74               |        |        |                 |                    |
| <b>Electrolyte drinks</b>         | 14               |        |        |                 |                    |
| Electrolyte drinks                | 14               |        |        |                 |                    |
| <b>Fruit and vegetable juices</b> | 254              | 8      | 3      | 8               |                    |
| Juices                            | 149              | 8      | 5      | 8               |                    |
| Nectars                           | 105              |        |        |                 |                    |
| <b>Soft drinks</b>                | 366              | 1      | 0      | 1               |                    |
| Energy drinks                     | 25               |        |        |                 |                    |
| Soft drinks                       | 341              | 1      | 0      | 1               |                    |
| <b>Waters</b>                     | 58               |        |        |                 |                    |
| Waters                            | 58               |        |        |                 |                    |
| <b>Bread and bakery products</b>  | 971              | 84     | 9      | 30              | 54                 |
| <b>Biscuits</b>                   | 463              | 30     | 6      |                 | 30                 |
| Biscuits                          | 463              | 30     | 6      |                 | 30                 |
| <b>Bread</b>                      | 275              | 26     | 9      | 16              | 10                 |
| Bread                             | 127              | 17     | 13     | 13              | 4                  |
| Crispy bread                      | 96               | 7      | 7      | 2               | 5                  |
| Dough                             | 39               | 1      | 3      |                 | 1                  |
| Tortillas                         | 13               | 1      | 8      | 1               |                    |
| <b>Cakes, muffins and pastry</b>  | 233              | 28     | 12     | 14              | 14                 |
| Cakes, muffins & pastry           | 233              | 28     | 12     | 14              | 14                 |
| <b>Cereal and cereal products</b> | 897              | 72     | 8      | 57              | 15                 |
| <b>Breakfast cereals</b>          | 274              | 20     | 7      | 8               | 12                 |
| Breakfast cereals                 | 240              | 20     | 8      | 8               | 12                 |
| Cereal flakes and bran            | 34               |        |        |                 |                    |
| <b>Cereal bars</b>                | 46               |        |        |                 |                    |
| Cereal bars                       | 46               |        |        |                 |                    |
| <b>Pasta</b>                      | 422              | 34     | 8      | 31              | 3                  |
| Dry filled pasta                  | 4                |        |        |                 |                    |
| Dry pasta                         | 287              | 28     | 10     | 27              | 1                  |
| Fresh filled pasta                | 67               | 3      | 4      | 1               | 2                  |
| Fresh pasta                       | 2                |        |        |                 |                    |
| Noodles                           | 62               | 3      | 5      | 3               |                    |
| <b>Rice</b>                       | 96               | 11     | 11     | 11              |                    |
| Rice                              | 96               | 11     | 11     | 11              |                    |
| <b>Unprocessed cereals</b>        | 59               | 7      | 12     | 7               |                    |
| Unprocessed cereals               | 59               | 7      | 12     | 7               |                    |
| <b>Confectionery</b>              | 968              | 30     | 3      |                 | 30                 |
| <b>Chewing gum</b>                | 57               | 1      | 2      |                 | 1                  |
| Chewing gum                       | 57               | 1      | 2      |                 | 1                  |
| <b>Chocolate and sweets</b>       | 828              | 23     | 3      |                 | 23                 |
| Chocolate and sweets              | 828              | 23     | 3      |                 | 23                 |
| <b>Jelly</b>                      | 83               | 6      | 7      |                 | 6                  |
| Jelly                             | 83               | 6      | 7      |                 | 6                  |
| <b>Convenience foods</b>          | 566              | 18     | 3      | 10              | 8                  |
| <b>Other</b>                      | 128              | 5      | 4      | 5               |                    |
| Side dishes                       | 128              | 5      | 4      | 5               |                    |
| <b>Pizza</b>                      | 31               | 1      | 3      | 1               |                    |

|                                           | All products (N) | GF (N) | GF (%) | »Healthier« (N) | »Less healthy« (N) |
|-------------------------------------------|------------------|--------|--------|-----------------|--------------------|
| Pizza                                     | 31               | 1      | 3      | 1               |                    |
| <b>Pre-prepared salads and sandwiches</b> | 61               | 1      | 2      | 1               |                    |
| Pre-prepared salads and sandwiches        | 61               | 1      | 2      | 1               |                    |
| <b>Ready meals</b>                        | 180              | 3      | 2      | 2               | 1                  |
| Ready meals                               | 180              | 3      | 2      | 2               | 1                  |
| <b>Soup</b>                               | 166              | 8      | 5      | 1               | 7                  |
| Soup                                      | 166              | 8      | 5      | 1               | 7                  |
| <b>Dairy</b>                              | 1430             | 123    | 9      | 75              | 48                 |
| <b>Cheese</b>                             | 358              | 6      | 2      | 3               | 3                  |
| Cheese                                    | 195              | 3      | 2      | 3               |                    |
| Cheese imitates                           | 2                | 2      | 100    |                 | 2                  |
| Cottage cheese                            | 42               |        |        |                 |                    |
| Spreads and processed cheese              | 119              | 1      | 1      |                 | 1                  |
| <b>Cream</b>                              | 97               | 7      | 7      | 4               | 3                  |
| Cream                                     | 71               |        |        |                 |                    |
| Cream imitates                            | 26               | 7      | 27     | 4               | 3                  |
| <b>Desserts</b>                           | 117              | 22     | 19     | 20              | 2                  |
| Desserts                                  | 117              | 22     | 19     | 20              | 2                  |
| <b>Ice cream and edible ices</b>          | 190              | 14     | 7      |                 | 14                 |
| Ice cream and edible ices                 | 190              | 14     | 7      |                 | 14                 |
| <b>Milk</b>                               | 202              | 60     | 30     | 35              | 25                 |
| Instant cocoa                             | 30               | 1      | 3      | 1               |                    |
| Milk                                      | 61               |        |        |                 |                    |
| Milk drinks                               | 22               | 1      | 5      | 1               |                    |
| Milk imitates                             | 89               | 58     | 65     | 33              | 25                 |
| <b>Yoghurt products</b>                   | 466              | 14     | 3      | 13              | 1                  |
| Flavoured yogurt                          | 243              | 3      | 1      | 2               | 1                  |
| Flavoured yogurt drinks                   | 87               |        |        |                 |                    |
| Plain yogurt                              | 110              |        |        |                 |                    |
| Yogurt imitates                           | 26               | 11     | 42     | 11              |                    |
| <b>Edible oils and emulsions</b>          | 239              |        |        |                 |                    |
| <b>Butter and margarine</b>               | 80               |        |        |                 |                    |
| Butter                                    | 29               |        |        |                 |                    |
| Margarine                                 | 51               |        |        |                 |                    |
| <b>Cooking oils</b>                       | 159              |        |        |                 |                    |
| Cooking oils                              | 159              |        |        |                 |                    |
| <b>Eggs</b>                               | 22               |        |        |                 |                    |
| <b>Eggs</b>                               | 22               |        |        |                 |                    |
| Eggs                                      | 22               |        |        |                 |                    |
| <b>Fish and fish products</b>             | 227              | 30     | 13     | 19              | 11                 |
| <b>Canned fish and seafood</b>            | 157              | 30     | 19     | 19              | 11                 |
| Canned fish                               | 90               | 10     | 11     | 2               | 8                  |
| Canned fish with vegetable                | 31               | 13     | 42     | 10              | 3                  |
| Fish spreads                              | 36               | 7      | 19     | 7               |                    |
| <b>Chilled fish</b>                       | 70               |        |        |                 |                    |
| Processed fish products                   | 25               |        |        |                 |                    |
| Unprocessed fish                          | 45               |        |        |                 |                    |
| <b>Fruit and vegetables</b>               | 818              | 17     | 2      | 12              | 5                  |
| <b>Fruit</b>                              | 201              | 7      | 3      | 6               | 1                  |
| Canned fruit                              | 69               | 1      | 1      | 1               |                    |
| Dried fruit                               | 94               | 5      | 5      | 4               | 1                  |
| Frozen fruit                              | 18               |        |        |                 |                    |
| Nuts and fruit mixes                      | 20               | 1      | 5      | 1               |                    |
| <b>Jam and spreads</b>                    | 122              | 7      | 6      | 3               | 4                  |
| Jam and spreads                           | 122              | 7      | 6      | 3               | 4                  |
| <b>Nuts and seeds</b>                     | 108              | 2      | 2      | 2               |                    |
| Nuts and seeds                            | 108              | 2      | 2      | 2               |                    |
| <b>Vegetables</b>                         | 387              | 1      | 0      | 1               |                    |
| Canned vegetables                         | 293              | 1      | 0      | 1               |                    |
| Dried vegetables                          | 11               |        |        |                 |                    |
| Frozen vegetables                         | 83               |        |        |                 |                    |
| <b>Meat and meat products</b>             | 510              | 68     | 13     | 14              | 54                 |

|                                       | All products (N) | GF (N) | GF (%) | »Healthier« (N) | »Less healthy« (N) |
|---------------------------------------|------------------|--------|--------|-----------------|--------------------|
| <b>Meat alternatives</b>              | 46               | 1      | 2      | 1               |                    |
| Meat alternatives                     | 46               | 1      | 2      | 1               |                    |
| <b>Processed meat and derivatives</b> | 464              | 67     | 14     | 13              | 54                 |
| Animal fat products                   | 11               | 2      | 18     |                 | 2                  |
| Meat spreads                          | 66               | 7      | 11     |                 | 7                  |
| Processed meat                        | 348              | 57     | 16     | 12              | 45                 |
| Unprocessed meat                      | 39               | 1      | 3      | 1               |                    |
| <b>Sauces and spreads</b>             | 366              | 39     | 11     | 9               | 30                 |
| <b>Mayonnaise/dressings</b>           | 53               | 7      | 13     |                 | 7                  |
| Mayonnaise/dressings                  | 53               | 7      | 13     |                 | 7                  |
| <b>Sauces</b>                         | 220              | 14     | 6      | 6               | 8                  |
| Other souces                          | 135              | 6      | 4      | 1               | 5                  |
| Pasta sauces                          | 79               | 8      | 10     | 5               | 3                  |
| Sweet sauces                          | 6                |        |        |                 |                    |
| <b>Spreads</b>                        | 93               | 18     | 19     | 3               | 15                 |
| Nut spreads                           | 17               | 2      | 12     |                 | 2                  |
| Other spreads                         | 2                |        |        |                 |                    |
| Sweet spreads                         | 35               | 7      | 20     |                 | 7                  |
| Vegetable spreads                     | 39               | 9      | 23     | 3               | 6                  |
| <b>Snackfoods</b>                     | 231              | 18     | 8      | 4               | 14                 |
| <b>Crisps and snacks</b>              | 231              | 18     | 8      | 4               | 14                 |
| Crisps and snacks                     | 231              | 18     | 8      | 4               | 14                 |
